# Supplementary material
Source: PubMed Central journal article supplement (PMC3840741)

**Table S1** Muscle cellularity of TA muscles in 2.5-month-old vs. 7-month-old male *Cmpt* mice

| <b>Mouse line</b>                    | <b>Cmpt</b> | <b>Cmpt</b> |
|--------------------------------------|-------------|-------------|
| <b>Age (in months)</b>               | 2.5         | 7           |
| <b>Muscle type</b>                   | TA          | TA          |
| <b>Fiber number<br/>(mean ± SEM)</b> | 5455 ± 114  | 5450 ± 136  |
| <b>Fiber size<br/>(mean ± SEM)</b>   | 2114 ± 118  | 2193 ± 95   |
| <b>Number of values</b>              | 5           | 3           |

**Supplemental Figure**

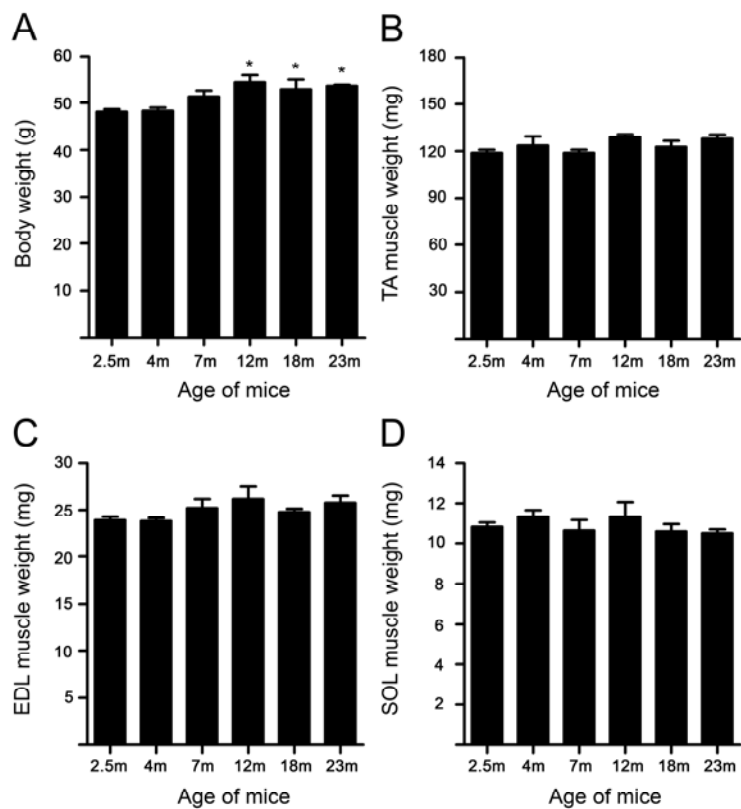

Supplement: supp_0022155413503661_10.1369_0022155413503661_Supplemental_Material.pdf [file supp_0022155413503661_10.1369_0022155413503661_Supplemental_Material.pdf]
